# Supplementary material
Source: PubMed Central journal article supplement (PMC8720328)
Supplement: NIHMS1749949-supplement-Supplementary_Material.pdf [file NIHMS1749949-supplement-Supplementary_Material.pdf]

ONLINE ONLY

## Supplemental material

**Somatic mosaicism in the MAPK pathway in sporadic brain arteriovenous malformation and association with phenotype**

Gao et al.

<https://thejns.org/doi/abs/10.3171/2020.11.JNS202031>

**DISCLAIMER** The *Journal of Neurosurgery* acknowledges that the following section is published verbatim as submitted by the authors and did not go through either the *Journal's* peer-review or editing process.

Supplemental Table 1.

Clinical phenotype and allelic burden of somatic *KRAS* mutations for sporadic BAVM subjects.

| Subject | Sex | Race | BAVM size (mm) | Age at DX (y) | Age at resection (y) | First TX | Age at first TX (y) | Age at first ICH (y) | Venous drainage (type) | Associated aneurysm (number) | G12V Allelic Freq (%) | G12D Allelic Freq (%) |
|---------|-----|------|----------------|---------------|----------------------|----------|---------------------|----------------------|------------------------|------------------------------|-----------------------|-----------------------|
| D1      | F   | 1    | 28.5           | 8.2           | 8.2                  | S        | 8.2                 | 8.2                  | DS                     | 0                            | F                     | F                     |
| D2      | M   | 1    | 15             | 5.9           | 6.5                  | S        | 5.9                 | 5.9                  | D                      | unknown                      | 0                     | 0.98                  |
| D3      | F   | 1    | 29             | 30.9          | 31.5                 | S        | 31.4                |                      | S                      | 1                            | 4.99                  | 0                     |
| D4      | F   | 1    | 20             | 63.6          | 63.6                 | S        | 63.6                | 63.6                 | D                      | 0                            | 0                     | 0                     |
| D5      | M   | 1    | 25             | 47.4          | 47.6                 | S        | 47.6                | 47.4                 | S                      | 0                            | N/A                   | N/A                   |
| D6      | F   | 1    | 10             | 54.1          | 54.9                 | S        | 54.9                | 54.1                 | S                      | unknown                      | 0                     | 0.08                  |
| D7      | F   | 1    | 10             | 67.4          | 67.5                 | S        | 67.4                | 67.4                 | S                      | unknown                      | 0                     | 0                     |
| D8      | M   | 1    | 10             | 9.1           | 9.1                  | S        | 9.1                 | 9.1                  | D                      | 1                            | 3.5                   | 0                     |
| D9      | F   | 1    | 10             | 15.4          | 15.4                 | S        | 15.4                | 15.4                 | unknown                | unknown                      | 0.24                  | 0                     |
| D10     | F   | 1    | 29.2           | 29.9          | 30.2                 | S        | 30.2                |                      | S                      | 0                            | 0.46                  | 0                     |
| D11     | M   | 1    | 15             | 38.7          | 38.7                 | S        | 38.7                |                      | S                      | 0                            | 0                     | 2.56                  |
| D12     | M   | 1    | 10             | 47.0          | 47.2                 | S        | 47.2                | 47.0                 | S                      | unknown                      | 0                     | 2.52                  |
| D13     | M   | 1    | 3              | 45.3          | 45.5                 | S        | 45.5                |                      | S                      | 0                            | 0                     | 0.19                  |
| D14     | F   | 1    | 20             | 40.7          | 40.7                 | E        | 40.7                |                      | S                      | 0                            | 0                     | 3                     |
| R1      | M   | 1    | 14             | 62.8          | 63.3                 | S        | 63.3                |                      | S                      | 0                            | 0                     | 1.18                  |
| R2      | F   | 1    | 25             | 25.3          | 26.7                 | RS       | 26.1                | 25.3                 | S                      | 0                            | 0                     | 1.81                  |
| R3      | M   | 1    | 20             | 13.7          | 13.7                 | S        | 13.7                | 13.7                 | D                      | 0                            | 0                     | 0.14                  |
| R4      | F   | 1    | 10.8           | 28.3          | 28.4                 | E        | 28.3                | 28.3                 | S                      | 0                            | F                     | F                     |
| R5      | M   | 1    | 15             | 13.6          | 13.6                 | S        | 13.6                | 13.6                 | D                      | 0                            | 0                     | 0.11                  |
| R6      | F   | 9    | 17             | 14.7          | 14.8                 | S        | 14.8                | 14.7                 | D                      | 0                            | 0                     | 0                     |
| R7      | F   | 1    | 42             | 13.2          | 13.2                 | S        | 13.2                | 13.2                 | S                      | 0                            | 0                     | 0                     |
| R8      | M   | 1    | 14             | 11.6          | 12.2                 | E        | 11.6                | 11.6                 | S                      | 1                            | 0                     | 0                     |
| R9      | F   | 9    | 11             | 16.5          | 16.5                 | S        | 16.5                | 16.5                 | S                      | 0                            | 0.11                  | F                     |
| R10     | M   | 1    | 25             | 16.8          | 17.4                 | S        | 17.4                |                      | S                      | 0                            | 0                     | 0                     |
| R11     | M   | 1    | 18.8           | 0.1           | 0.5                  | S        | 0.5                 | 0.1                  | S                      | 0                            | 0                     | F                     |
| R12     | F   | 9    | 18.1           | 13.1          | 13.1                 | S        | 13.1                | 13.1                 | S                      | 0                            | 0                     | F                     |
| R13     | F   | 1    | 17.5           | 14.3          | 14.4                 | E        | 14.3                | 14.3                 | D                      | 0                            | 0                     | 0                     |
| R14     | F   | 4    | 56.3           | 14.1          | 14.1                 | E        | 14.1                | 14.1                 | DS                     | 0                            | 0                     | 0                     |

|     |   |   |      |      |      |   |      |      |    |         |      |      |
|-----|---|---|------|------|------|---|------|------|----|---------|------|------|
| R15 | M | 9 | 35   | 17.2 | 17.3 | E | 17.3 |      | DS | 0       | 0    | 0.96 |
| R16 | F | 9 | 40   | 13.4 | 13.4 | S | 13.4 |      | S  | 0       | 0    | F    |
| R17 | M | 1 | 25.4 | 17.0 | 17.3 | E | 17.3 |      | DS | 0       | 0    | 0.47 |
| R18 | M | 9 | 30   | 15.2 | 15.6 | E | 15.6 |      | DS | 0       | 0    | 0.41 |
| R19 | M | 9 | 40   | 53.0 | 53.3 | S | 53.2 |      | DS | 0       | 3.65 | 0    |
| R20 | M | 1 | 40   | 27.9 | 28.3 | S | 28.3 |      | S  | 0       | 0.05 | 0    |
| R21 | F | 4 | 30   | 24.7 | 24.8 | S | 24.7 | 24.7 | S  | unknown | 0    | 0.41 |
| R22 | M | 1 | 30   | 41.3 | 41.5 | S | 41.4 |      | S  | 0       | 0    | 0    |
| R23 | F | 1 | 29   | 24.2 | 61.6 | S | 61.6 | 61.5 | S  | 0       | 0    | 3.76 |
| R24 | M | 9 | 29   | 28.1 | 28.7 | S | 28.7 | 28.1 | DS | 0       | 0    | 2.29 |
| R25 | F | 4 | 29   | 24.3 | 24.3 | S | 24.3 | 24.3 | S  | unknown | 0    | 1.08 |
| R26 | F | 4 | 25.6 | 26.1 | 38.4 | S | 38.4 |      | S  | 1       | 0    | 0    |
| R27 | M | 9 | 25.3 | 47.9 | 48.0 | S | 47.9 | 47.9 | DS | 0       | 0    | 3.23 |
| R28 | F | 1 | 25   | 37.3 | 39.5 | S | 39.5 |      | D  | 0       | 4.32 | 0    |
| R29 | M | 1 | 20.2 | 24.2 | 24.3 | S | 24.2 | 24.2 | S  | 0       | 0    | F    |
| R30 | F | 1 | 20   | 54.1 | 54.4 | S | 54.4 |      | S  | 0       | 0    | 1.06 |
| R31 | M | 9 | 19.2 | 21.7 | 22.1 | S | 22.1 | 21.7 | D  | 0       | 0    | 0    |
| R32 | F | 9 | 18   | 58.8 | 58.9 | S | 58.9 |      | S  | 2       | 0    | 0    |
| R33 | M | 2 | 17.9 | 54.3 | 54.3 | S | 54.3 | 54.3 | DS | 0       | 0    | 0    |
| R34 | F | 1 | 17   | 47.1 | 47.5 | S | 47.5 |      | S  | 1       | 0    | 0    |
| R35 | F | 1 | 13.3 | 59.1 | 59.5 | S | 59.5 | 59.1 | S  | 0       | 2.55 | 0    |
| R36 | M | 1 | 10   | 58.9 | 59.0 | S | 58.9 | 58.9 | S  | 0       | 0    | F    |
| R37 | M | 9 | 10   | 58.5 | 58.5 | S | 58.5 | 58.5 | S  | unknown | 0    | 0.34 |
| R38 | M | 1 | 10   | 39.5 | 40.3 | S | 40.3 | 39.5 | D  | 0       | 0    | 0    |
| R39 | F | 9 | 10   | 49.1 | 49.3 | S | 49.2 |      | S  | 4       | 0    | 0    |
| R40 | M | 1 | 9    | 61.2 | 61.3 | S | 61.3 | 61.2 | S  | 0       | 0    | 0    |
| R41 | F | 1 | 7.8  | 57.8 | 57.8 | S | 57.8 | 57.8 | S  | 0       | 0.3  | 0    |
| R42 | F | 1 | 7    | 51.3 | 51.4 | S | 51.3 | 51.3 | D  | 1       | 0    | 0    |
| R43 | M | 1 | 7    | 28.3 | 28.3 | S | 28.3 | 28.3 | S  | 0       | 0    | 0.77 |
| R44 | M | 9 | 6.7  | 20.0 | 20.0 | S | 20.0 | 20.0 | D  | 1       | 0    | 0    |
| R45 | F | 2 | 6.5  | 58.7 | 58.7 | S | 58.7 | 58.7 | S  | 0       | 0    | 0.04 |
| R46 | M | 9 | 6    | 32.2 | 32.2 | S | 32.2 | 32.2 | S  | 0       | 0    | 0    |
| R47 | F | 1 | 5    | 40.9 | 41.3 | S | 41.2 | 40.9 | S  | 0       | 0    | 0    |
| R48 | M | 1 | 2    | 41.6 | 42.0 | S | 41.9 | 41.6 | S  | 0       | 0    | 0    |

|            |   |   |      |      |      |   |      |      |    |   |   |   |
|------------|---|---|------|------|------|---|------|------|----|---|---|---|
| <b>R49</b> | M | 1 | 28   | 35.8 | 35.8 | S | 35.8 |      | D  | 0 | F | 0 |
| <b>R50</b> | M | 1 | 28   | 27.6 | 27.9 | S | 27.9 |      | DS | 0 | F | F |
| <b>R51</b> | F | 1 | 19   | 63.9 | 63.9 | S | 63.9 | 63.9 | S  | 0 | 0 | F |
| <b>R52</b> | F | 1 | 17.3 | 53.8 | 54.1 | S | 54.1 |      | S  | 0 | 0 | F |
| <b>R53</b> | F | 1 | 13.3 | 47.9 | 48.1 | S | 48.0 |      | D  | 0 | 0 | 0 |
| <b>R54</b> | M | 1 | 13   | 43.5 | 43.6 | S | 43.6 |      | S  | 3 | 0 | 0 |
| <b>R55</b> | F | 4 | 12   | 54.0 | 54.0 | S | 54.0 | 54.0 | D  | 0 | 0 | 0 |
| <b>R56</b> | M | 1 | 10   | 55.5 | 55.7 | S | 55.7 |      | S  | 0 | 0 | F |

Legend:

Subject: D, discovery, R, replication.

Race: 1-White, 2-African American, 4-Asian, 9-More than one race.

DX, BAVM diagnosis.

TX: first treatment: S, surgery, RS, radiosurgery, E, embolization.

Venous drainage: D, deep, S, superficial, DS, both deep and superficial.

Associated aneurysms: number of BAVM-associated aneurysms.

Allelic Freq: somatic mutation allelic frequency by ddPCR. F: failed QC. N/A: not available, or not enough DNA.

## Supplemental Table 2.

### Variant filtering results for whole exome sequencing in 14 sporadic BAVM subjects.

| Subject               | Original Mutect2 variants | PASS Mutect2 variants | Variants with 0 counts in blood | Variants with $\geq 3$ counts in BAVM | Variants with allelic freq $\geq 2\%$ | NS variants | Probably damaging variants |
|-----------------------|---------------------------|-----------------------|---------------------------------|---------------------------------------|---------------------------------------|-------------|----------------------------|
| D1                    | 3,628                     | 2,031                 | 1,903                           | 1,414                                 | 1,207                                 | 899         | 339                        |
| D2                    | 2,653                     | 1,301                 | 1,242                           | 814                                   | 643                                   | 485         | 187                        |
| D3                    | 2,536                     | 1,246                 | 1,177                           | 691                                   | 544                                   | 398         | 164                        |
| D4                    | 6,541                     | 4,271                 | 4,064                           | 3,428                                 | 3,256                                 | 2,343       | 955                        |
| D5                    | 3,498                     | 1,952                 | 1,830                           | 1,546                                 | 1,107                                 | 797         | 315                        |
| D6                    | 2,459                     | 1,220                 | 1,161                           | 734                                   | 640                                   | 464         | 189                        |
| D7                    | 4,472                     | 2,595                 | 2,446                           | 2,097                                 | 1,489                                 | 1,101       | 498                        |
| D8                    | 2,225                     | 760                   | 708                             | 362                                   | 230                                   | 164         | 63                         |
| D9                    | 1,742                     | 725                   | 681                             | 308                                   | 221                                   | 165         | 65                         |
| D10                   | 1,801                     | 824                   | 760                             | 347                                   | 249                                   | 180         | 70                         |
| D11                   | 2,848                     | 1,501                 | 1,412                           | 848                                   | 652                                   | 479         | 202                        |
| D12                   | 1,726                     | 665                   | 632                             | 262                                   | 197                                   | 142         | 39                         |
| D13                   | 4,447                     | 2,662                 | 2,483                           | 2,113                                 | 1,701                                 | 1,234       | 503                        |
| D14                   | 2,218                     | 848                   | 785                             | 454                                   | 217                                   | 153         | 63                         |
| <b>Total variants</b> | 37,591                    | 22,367                | 21,098                          | 15,238                                | 12,272                                | 8,946       | 3,624                      |

Legend:

Subject: D, discovery.

NS: non-synonymous.

**Supplemental Table 3.****Sequencing statistics for whole exome sequencing in 14 sporadic BAVM subjects.**

| <b>Subject</b> | <b>BAVM (X)</b> | <b>Blood (X)</b> | <b>BAVM Mapped Reads</b> | <b>BAVM Total Reads</b> | <b>BAVM % Mapped Reads</b> | <b>Blood Mapped Reads</b> | <b>Blood Total Reads</b> | <b>Blood % Mapped Reads</b> |
|----------------|-----------------|------------------|--------------------------|-------------------------|----------------------------|---------------------------|--------------------------|-----------------------------|
| <b>D1</b>      | 107             | 91               | 115,801,697              | 116,997,270             | 99.0                       | 110,124,635               | 111,665,824              | 98.6                        |
| <b>D2</b>      | 115             | 79               | 126,843,880              | 127,680,812             | 99.3                       | 100,393,152               | 101,559,918              | 98.9                        |
| <b>D3</b>      | 114             | 96               | 119,421,472              | 120,511,892             | 99.1                       | 109,920,415               | 111,055,036              | 99.0                        |
| <b>D4</b>      | 89              | 96               | 87,935,182               | 88,567,368              | 99.3                       | 119,195,662               | 120,773,302              | 98.7                        |
| <b>D5</b>      | 111             | 101              | 128,713,822              | 129,711,958             | 99.2                       | 126,106,540               | 127,777,516              | 98.7                        |
| <b>D6</b>      | 98              | 102              | 106,866,694              | 108,032,584             | 98.9                       | 122,431,818               | 124,110,874              | 98.6                        |
| <b>D7</b>      | 120             | 96               | 145,199,625              | 146,542,102             | 99.1                       | 121,005,707               | 122,311,954              | 98.9                        |
| <b>D8</b>      | 118             | 102              | 138,634,452              | 140,205,496             | 98.9                       | 121,875,893               | 123,481,094              | 98.7                        |
| <b>D9</b>      | 100             | 102              | 113,736,471              | 114,816,400             | 99.1                       | 127,330,009               | 129,206,910              | 98.5                        |
| <b>D10</b>     | 88              | 125              | 102,177,604              | 103,365,246             | 98.9                       | 151,473,066               | 153,100,136              | 98.9                        |
| <b>D11</b>     | 106             | 91               | 122,079,141              | 123,143,012             | 99.1                       | 109,569,801               | 110,574,906              | 99.1                        |
| <b>D12</b>     | 93              | 70               | 110,446,680              | 111,726,088             | 98.9                       | 89,639,763                | 90,815,102               | 98.7                        |
| <b>D13</b>     | 106             | 99               | 119,865,499              | 121,087,366             | 99.0                       | 119,211,511               | 120,451,626              | 99.0                        |
| <b>D14</b>     | 142             | 104              | 167,677,190              | 169,562,810             | 98.9                       | 124,022,177               | 125,408,192              | 98.9                        |

Legend:

Subject: D, discovery.

(X), average sequencing read coverage.

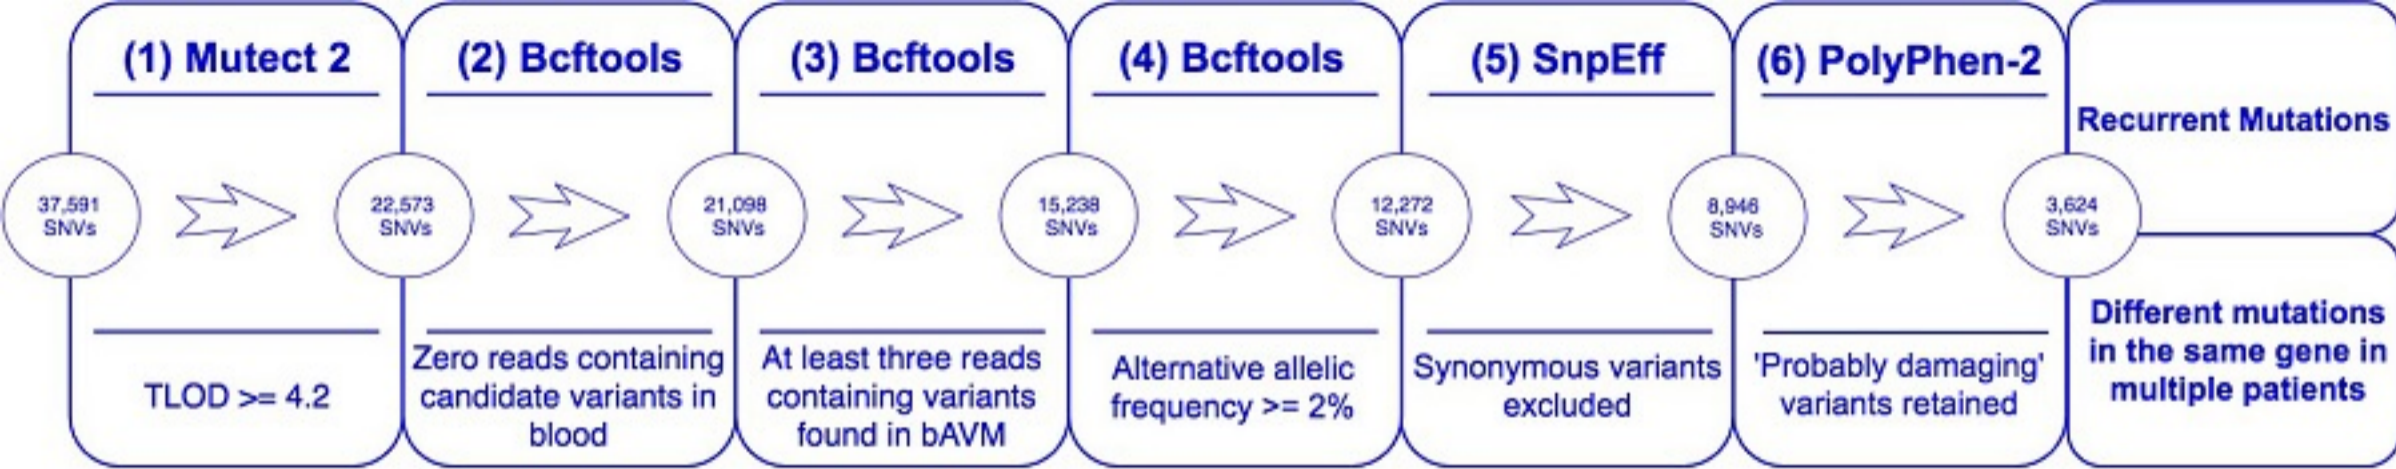

Supplemental Figure 1.  
Workflow for identification of candidate somatic BAVM-associated variants.

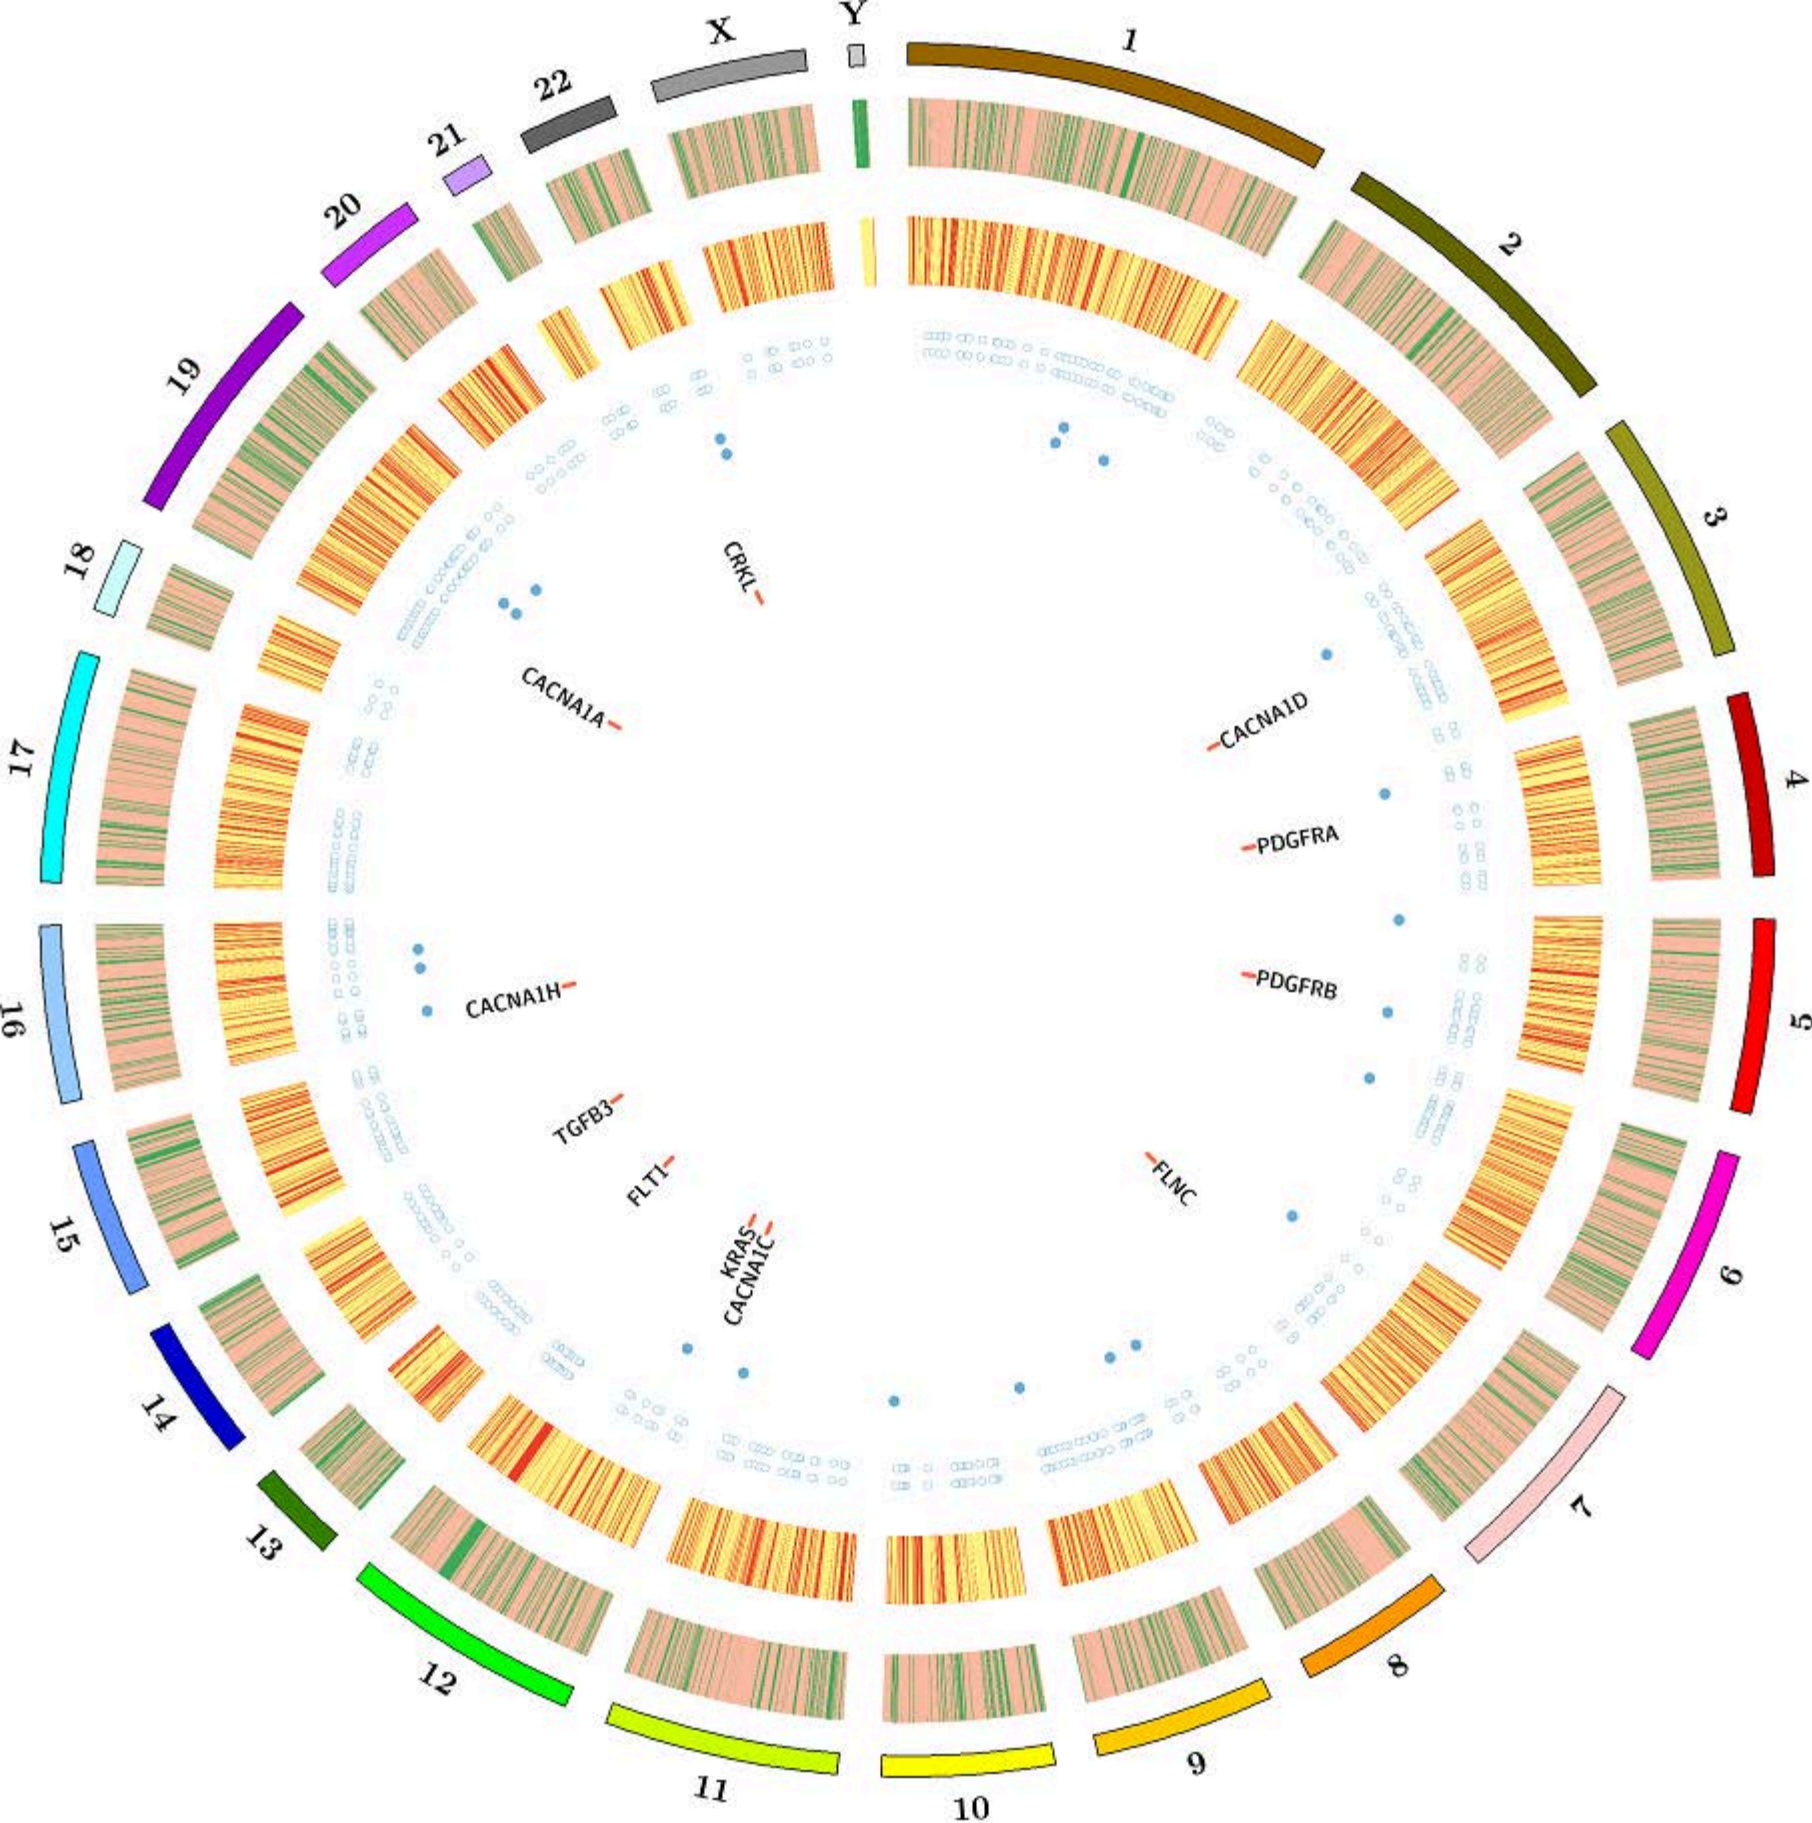

**Supplemental Figure 2.**

**Circos plot of sequencing coverage and distribution of candidate mutations.** From outer to inner concentric layers: (A) Targeted exome regions on each chromosome concatenated sequentially. (B) Targeted region coverage: light red: regions with good coverage (CSS < 0.2), green: regions with low coverage (CSS > 0.2). (C) Sample coverage: yellow: regions with uniform coverage across samples (UE < 1.37), red: regions with non-uniform coverage across samples (UE > 1.37). (D) Different mutations in the same gene in multiple patients across the whole exome. (E) Recurrent mutations across the whole exome. (F) MAPK pathway genes with mutations in more than one patient.
